# Supplementary material for: Rhodamine B as an efficient multifunctional passivator for the improvement of perovskite solar cell performance
Source: Royal Society of Chemistry journal article supplement (doi:10.1039/d3tc00818e), 2023-01-01
Supplement: d3tc00818e1.pdf [file d3tc00818e1.pdf]

## Support information

### Rhodamine B dye as an efficiently multifunctional passivation for the improvement of perovskite solar cell performance

Lei Jin, Yi-Lin Li, Jian Zhou,\* Chun-Mei Huang, and Xing Liu\*

Chongqing Key Laboratory of inorganic functional materials, College of chemistry, Chongqing  
normal university, Chongqing, 401331, P.R. China

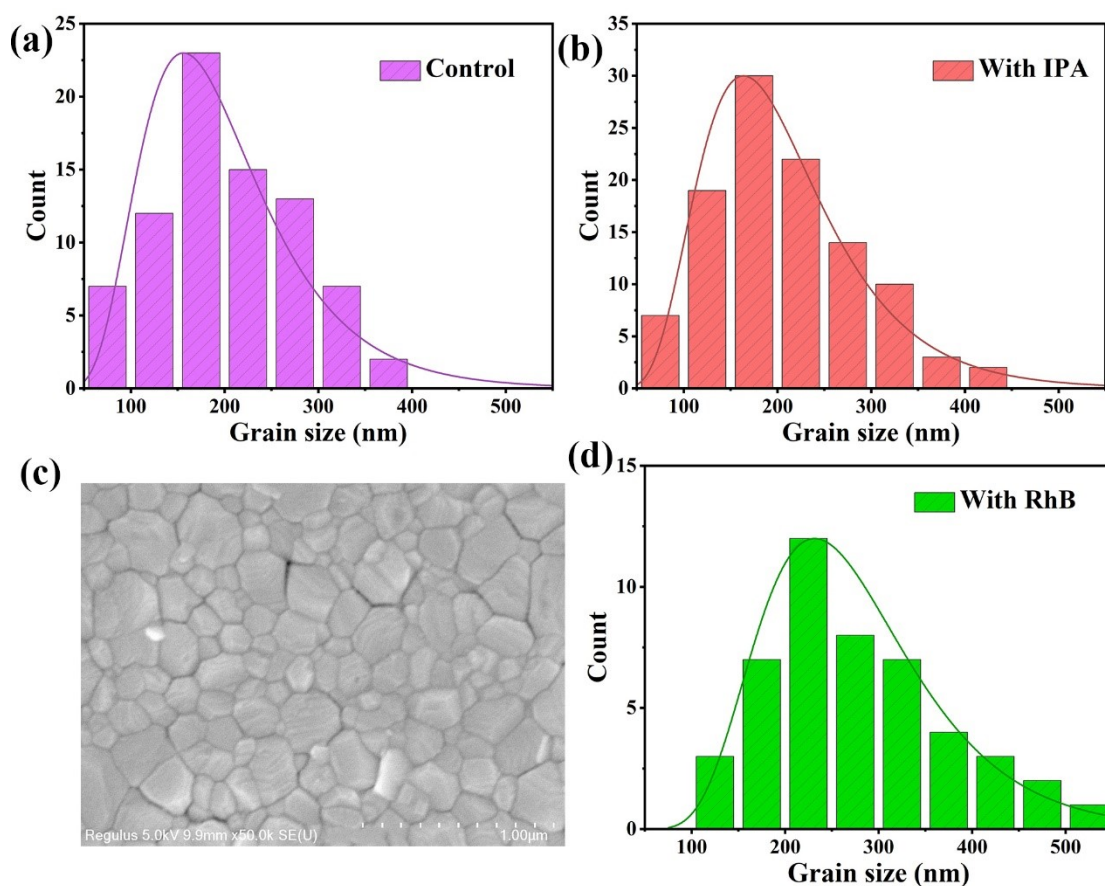

**Fig. S1.** The distribution histograms of grain sizes of (a) MAPbI<sub>3</sub>, (b) MAPbI<sub>3</sub>/IPA and (d) MAPbI<sub>3</sub>/RhB. (c) The top-view SEM images of MAPbI<sub>3</sub>/IPA.

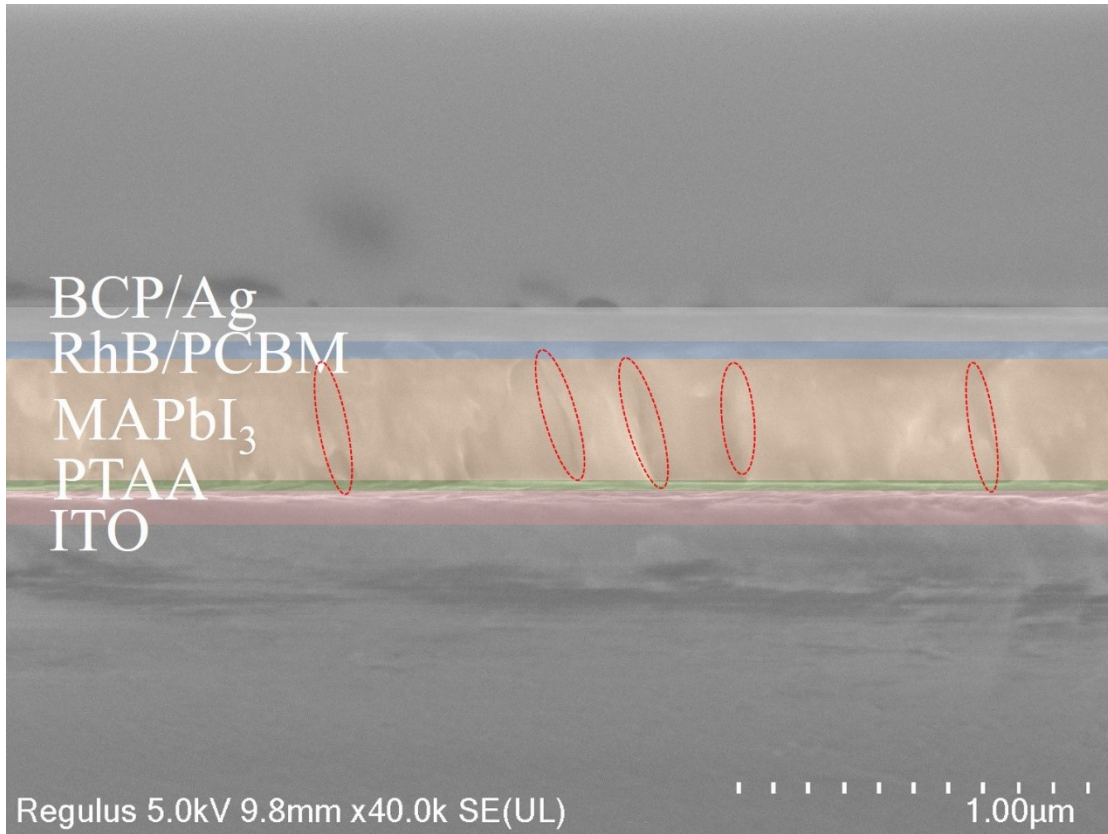

**Fig. S2.** Cross-sectional SEM images of MAPbI<sub>3</sub>/RhB films. (Grain boundaries become less and blurred)

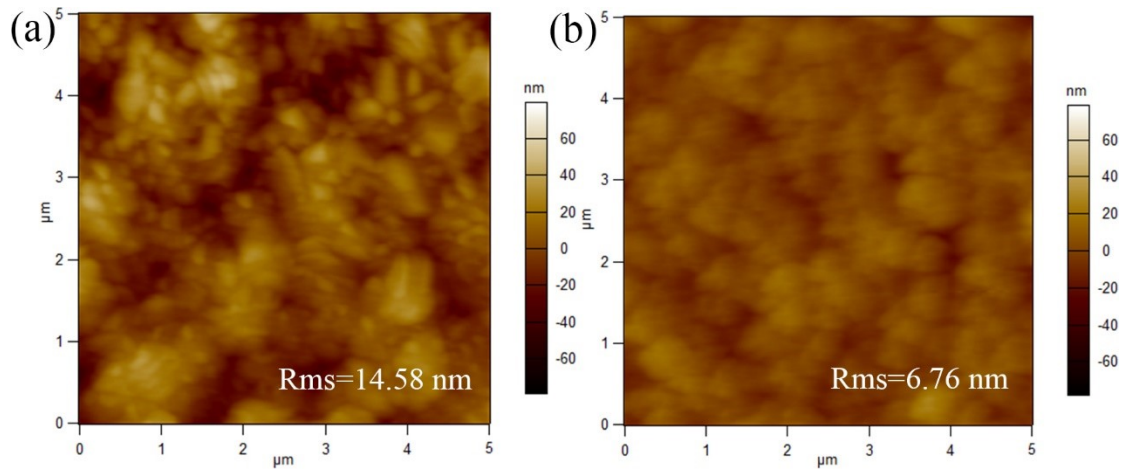

**Fig. S3.** The AFM images of the films (a) ITO/PTAA/MAPbI<sub>3</sub> and (b) ITO/PTAA/MAPbI<sub>3</sub>/RhB.

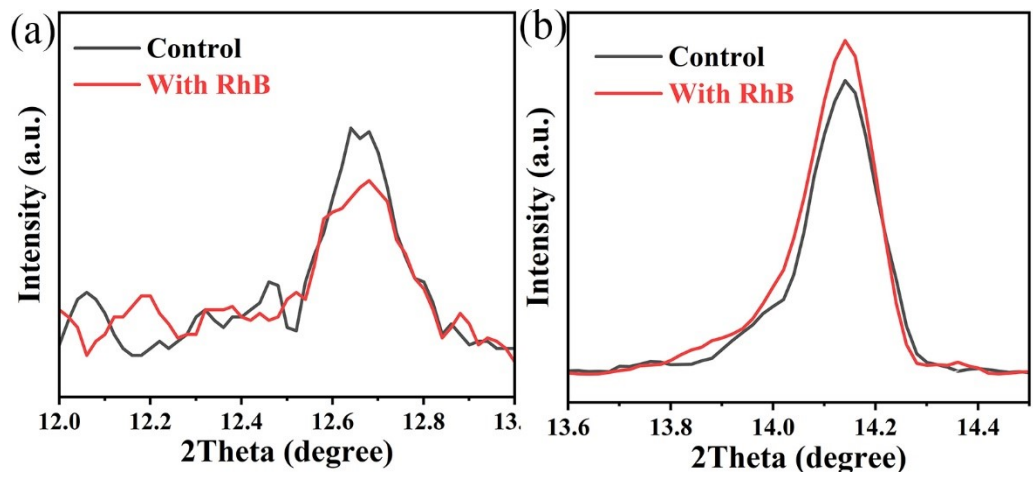

Fig. S4. (a) XRD peak of the PbI<sub>2</sub> at around 12.7°, (b) XRD of 110 planes of different films MAPbI<sub>3</sub> and MAPbI<sub>3</sub>/RhB.

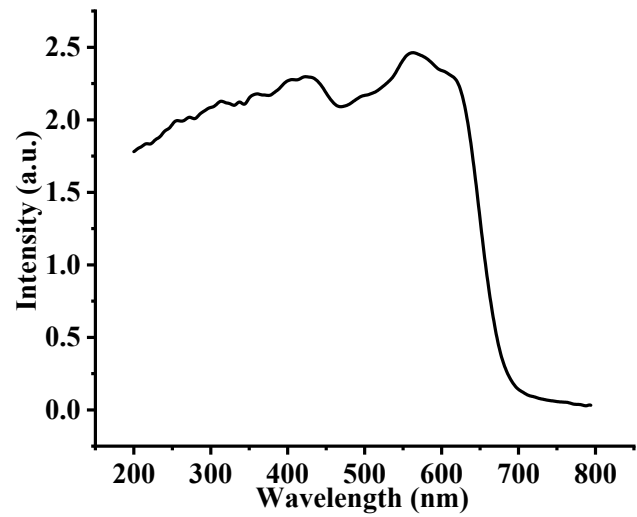

Fig. S5. The absorption spectra of RhB.

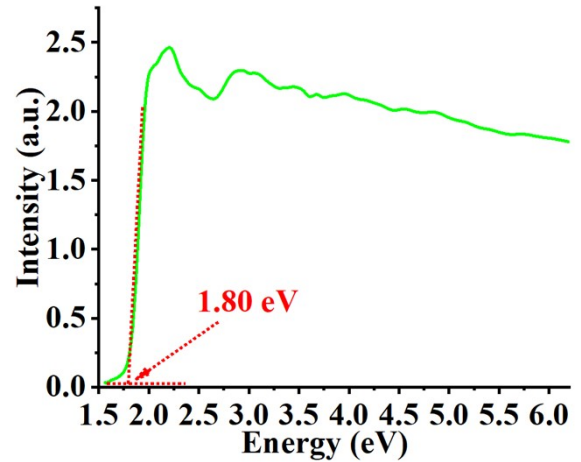

Fig. S6. Optical Bandgap Values of RhB

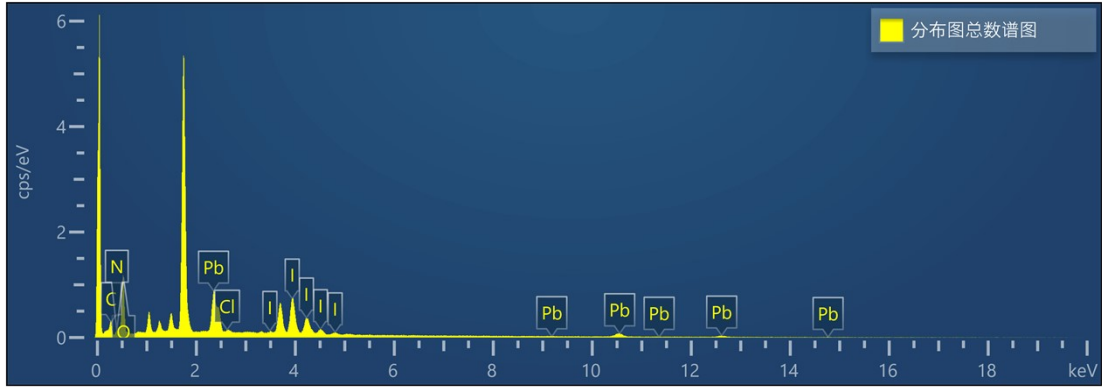

**Fig. S7.** The SEM-EDX analysis map of MAPbI<sub>3</sub>/RhB

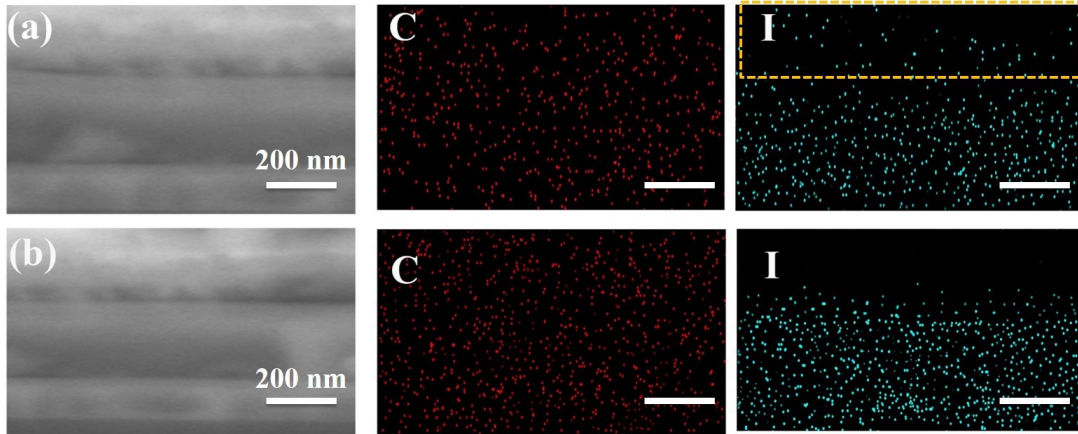

**Fig. S8.** EDS mapping spectra of C and I element distribution in the cross-section MAPbI<sub>3</sub> (a) and MAPbI<sub>3</sub>/RhB (b) film. EDS mapping spectra of cross-section I elements after aging in air (55±5% RH at room temperature) for 120 h.

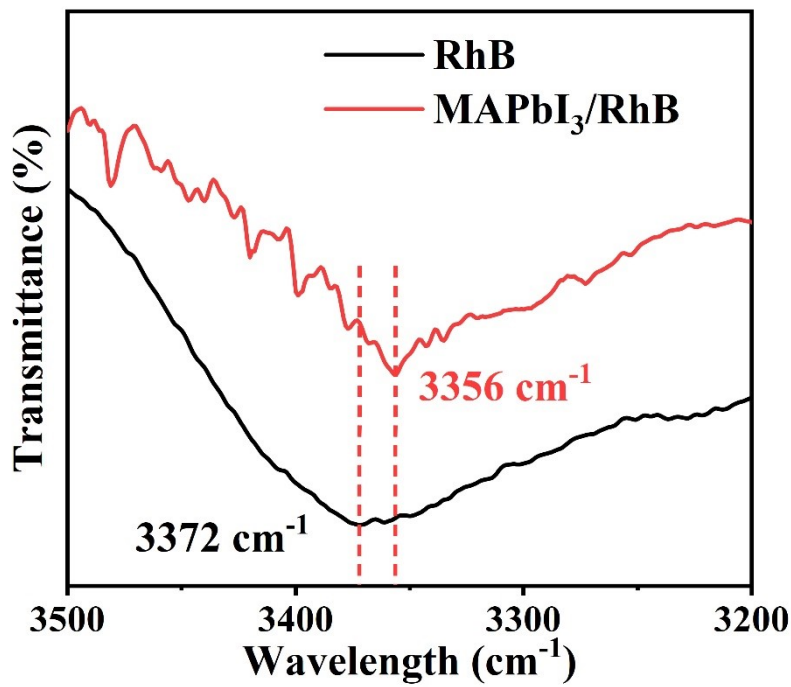

**Fig. S9.** -OH FTIR spectra of RhB and MAPbI<sub>3</sub>/RhB

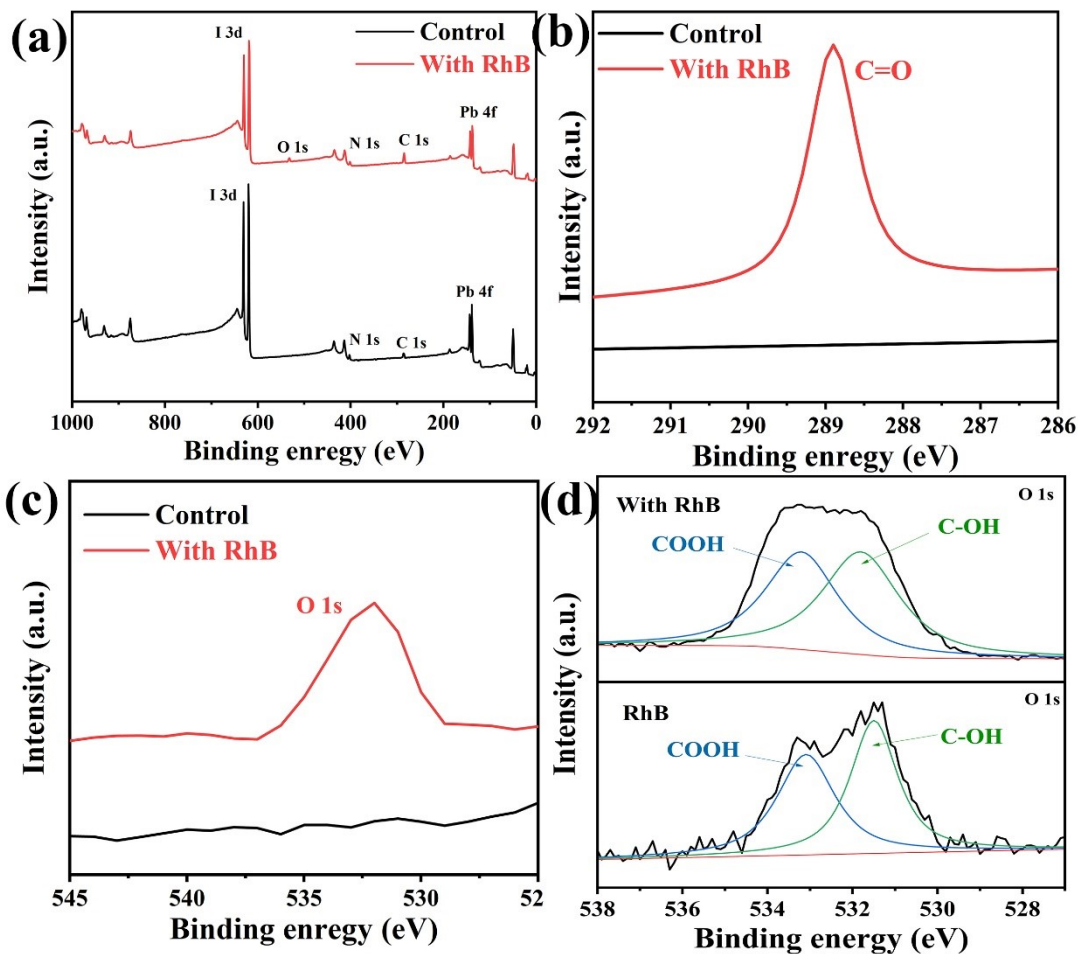

Fig. S10. (a) XPS spectra of MAPbI<sub>3</sub> and MAPbI<sub>3</sub>/RhB films, (b) C=O, (c) O 1s, (d) the O 1s XPS spectra of RhB and MAPbI<sub>3</sub>/RhB films.

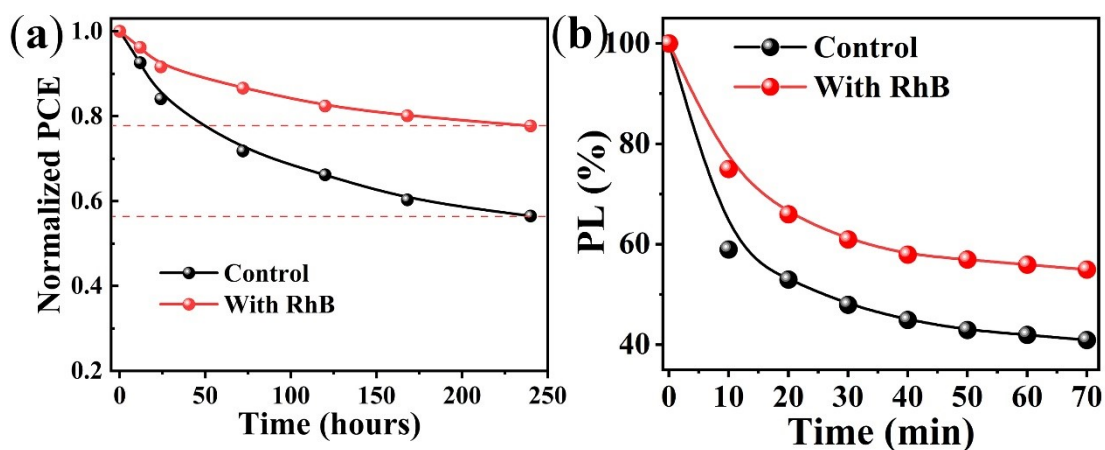

Fig. S11. (a) The stability of unsealed devices when subjected to thermal aging at 85 °C. (b) PL spectra of the MAPbI<sub>3</sub> and MAPbI<sub>3</sub>/RhB film as a function of UV light irradiation time.

**Table S1.** The HI is calculated based on Equation:  $HI = (PCE_{reverse} - PCE_{forward}) / (PCE_{reverse} + PCE_{forward})$ .

| Sample  | Direction | Voc (V) | Jsc (mA/cm <sup>2</sup> ) | FF (%) | PCE (%) | HI (%) | Average HI (%) |
|---------|-----------|---------|---------------------------|--------|---------|--------|----------------|
| RhB     | Forward   | 1.100   | 23.35                     | 78.41  | 20.18   | 0.05   | 0.06           |
|         | Reverse   | 1.100   | 23.32                     | 78.44  | 20.16   |        |                |
|         | Forward   | 1.106   | 22.57                     | 79.22  | 19.77   | 0.05   |                |
|         | Reverse   | 1.104   | 22.54                     | 79.55  | 19.79   |        |                |
|         | Forward   | 1.101   | 22.30                     | 79.35  | 19.48   | 0.07   |                |
|         | Reverse   | 1.100   | 22.26                     | 79.49  | 19.45   |        |                |
| Control | Forward   | 1.060   | 22.05                     | 77.46  | 18.10   | 1.37   | 1.38           |
|         | Reverse   | 1.060   | 21.78                     | 75.98  | 17.61   |        |                |
|         | Forward   | 1.050   | 21.68                     | 76.29  | 17.31   | 1.46   |                |
|         | Reverse   | 1.040   | 21.61                     | 74.51  | 16.81   |        |                |
|         | Forward   | 1.059   | 21.41                     | 76.15  | 17.26   | 1.32   |                |
|         | Reverse   | 1.052   | 21.29                     | 75.12  | 16.81   |        |                |

**Table S2.** Fitting parameters of TRPL spectra of different perovskite films

| Sample                       | $\tau_1$ (ns) | $A_1$ (%) | $\tau_2$ (ns) | $A_2$ (%) | $T_{ave}$ (ns) |
|------------------------------|---------------|-----------|---------------|-----------|----------------|
| MAPbI <sub>3</sub>           | 3.03          | 23.97     | 11.37         | 76.03     | 10.72          |
| MAPbI <sub>3</sub> /RhB      | 5.22          | 20.32     | 18.96         | 79.68     | 18.06          |
| MAPbI <sub>3</sub> /PCBM     | 3.83          | 4.72      | 1.66          | 95.28     | 1.89           |
| MAPbI <sub>3</sub> /RhB/PCBM | 3.20          | 7.20      | 1.39          | 92.80     | 1.74           |

**Table S3.** The EIS parameters of MAPbI<sub>3</sub> and MAPbI<sub>3</sub>/RhB devices, respectively

| Sample  | R <sub>s</sub> | R <sub>rec</sub> (Ω) | CPE1-T                 | CPE1-P  | R <sub>dr</sub> (Ω) | CPE2-T                 | CPE2-P  |
|---------|----------------|----------------------|------------------------|---------|---------------------|------------------------|---------|
| Control | 17.3           | 7456                 | 5.167×10 <sup>-9</sup> | 0.96921 | 29924               | 1.064×10 <sup>-6</sup> | 0.77301 |
| Rhb     | 10.06          | 15087                | 8.555×10 <sup>-9</sup> | 0.96751 | 39650               | 9.223×10 <sup>-7</sup> | 0.75807 |
